# Supplementary material for: Optimization of water chestnut ( Trapa bispinosa ) starch, fructo-oligosaccharide and inulin concentrations for low-fat flavoured yogurt consisting of a probiotic Lacticaseibacillus rhamnosus strain
Source: Royal Society of Chemistry journal article supplement (doi:10.1039/d4fb00101j), 2024-01-01
Supplement: d4fb00101j1.pdf [file d4fb00101j1.pdf]

## Supplementary Data

### Optimization of water chestnut (*Trapa bispinosa*) starch, fructo-oligosaccharide and inulin concentrations for low-fat flavoured yogurt consisting probiotic *Lactocaseibacillus rhamnosus* strain

**Running Title:** Low fat flavoured probiotic yogurt

**Authors:** Sangita Borah<sup>1</sup>, Tridisha Kakoty<sup>1</sup>, Pallab Kumar Borah<sup>1,2</sup>, Nikhil Kumar Mahnot<sup>3</sup>, Dibyakanta Seth<sup>4</sup>, Falguni Patra<sup>5</sup> and Raj Kumar Duary<sup>1,6\*</sup>

<sup>1</sup>Department of Food Engineering and Technology, Tezpur University, Tezpur, Assam-784028, India.

<sup>2</sup>Division of Food, Nutrition and Dietetics, School of Biosciences, University of Nottingham, LE12 5RD, United Kingdom

<sup>3</sup>Department of Food Technology, Rajiv Gandhi University, Rono-Hills, Doimukh, Arunachal Pradesh, 781112 India.

<sup>4</sup>Department of Food Process Engineering, National Institute of Technology, Rourkela, 769008, India.

<sup>5</sup>Mansinhbhai Institute of Dairy and Food Technology (MIDFT), Dudsagar Dairy, Mehshana, Gujarat, India.

<sup>6</sup>Department of Dairy Science and Food Technology, Institute of Agricultural Sciences, Banaras Hindu University (BHU), Varanasi, U.P., India- 221005.

## Corresponding author

\*Prof. Raj Kumar Duary, E-mail address: [rkduary@bhu.ac.in](mailto:rkduary@bhu.ac.in)

**Figure 1S: Length and breadth ratios of Water chestnut (a); Low-fat probiotic mango yoghurt during storage (b).**

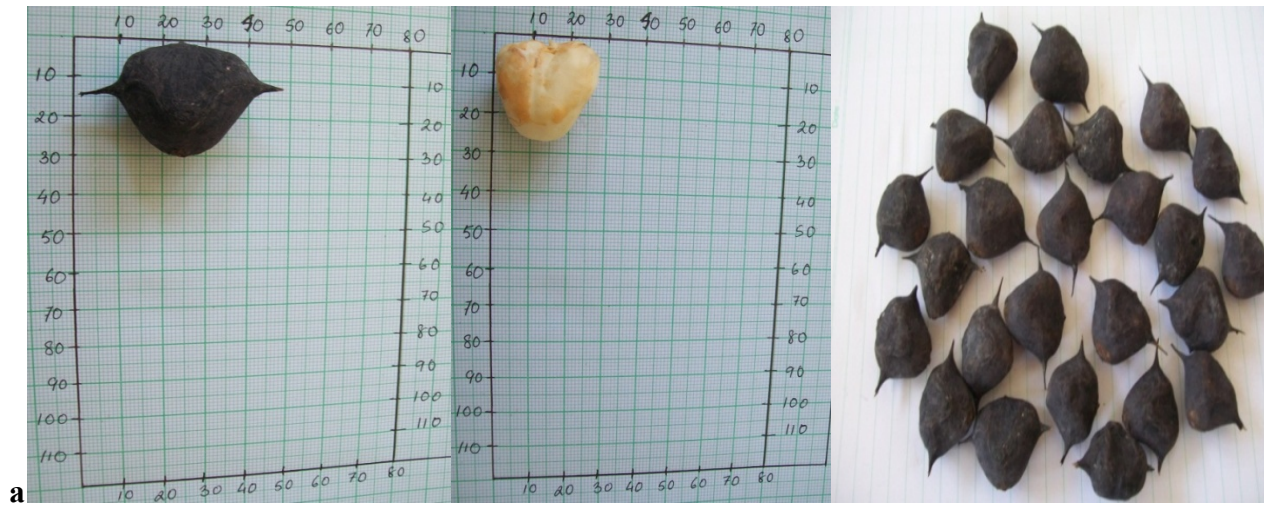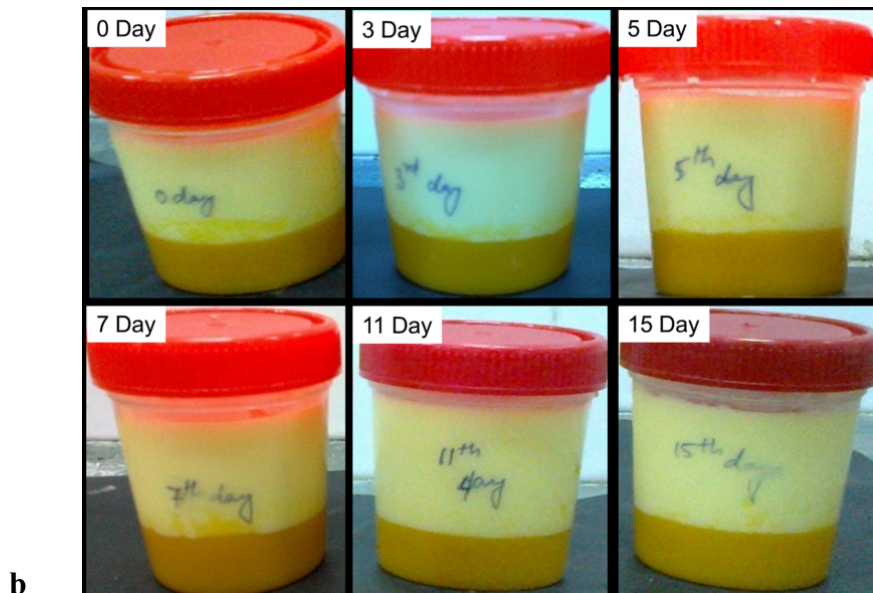

**Table 1S: Central composite face centered design (CCFD) with experimental values of response variables and some other physical properties of low-fat yogurt.**

| Run | Process Variables |            |         |            | Experimental Responses |                     |               |         |             |          |                    |              |
|-----|-------------------|------------|---------|------------|------------------------|---------------------|---------------|---------|-------------|----------|--------------------|--------------|
|     | Fat (%)           | Starch (%) | FOS (%) | Inulin (%) | pH                     | Titrateable Acidity | Syneresis (%) | WHC (%) | Consistency | Firmness | Index of Viscosity | Cohesiveness |
| 1   | 0.5               | 1.0        | 0.5     | 0.5        | 4.93                   | 0.49                | 62.00         | 22.70   | 7014.17     | 386.70   | -213.21            | -104.58      |
| 2   | 1.5               | 1.0        | 0.5     | 0.5        | 4.90                   | 0.48                | 36.40         | 32.25   | 6737.71     | 300.32   | -131.05            | -91.84       |
| 3   | 0.5               | 3.0        | 0.5     | 0.5        | 4.90                   | 0.51                | 65.44         | 32.88   | 8409.94     | 202.02   | -176.23            | -70.06       |
| 4   | 1.5               | 3.0        | 0.5     | 0.5        | 4.90                   | 0.49                | 26.80         | 33.52   | 6746.08     | 177.62   | -155.94            | -90.25       |
| 5   | 0.5               | 1.0        | 1.5     | 0.5        | 4.92                   | 0.48                | 57.00         | 22.98   | 5870.59     | 488.64   | -219.84            | -64.55       |
| 6   | 1.5               | 1.0        | 1.5     | 0.5        | 4.80                   | 0.46                | 36.72         | 31.43   | 6433.50     | 487.74   | -103.68            | -57.61       |
| 7   | 0.5               | 3.0        | 1.5     | 0.5        | 4.90                   | 0.48                | 58.56         | 32.80   | 7734.88     | 481.90   | -204.20            | -68.32       |
| 8   | 1.5               | 3.0        | 1.5     | 0.5        | 5.02                   | 0.49                | 40.00         | 33.28   | 7223.90     | 468.37   | -110.28            | -67.42       |
| 9   | 0.5               | 1.0        | 0.5     | 1.5        | 4.90                   | 0.48                | 64.66         | 32.8    | 6237.77     | 163.88   | -190.62            | -118.10      |
| 10  | 1.5               | 1.0        | 0.5     | 1.5        | 4.83                   | 0.47                | 28.00         | 32.08   | 8309.65     | 163.87   | -211.07            | -133.90      |
| 11  | 0.5               | 3.0        | 0.5     | 1.5        | 4.91                   | 0.51                | 66.00         | 24.27   | 7107.06     | 163.87   | -268.79            | -85.70       |
| 12  | 1.5               | 3.0        | 0.5     | 1.5        | 4.90                   | 0.51                | 46.40         | 37.90   | 7003.50     | 163.87   | -122.95            | -86.12       |
| 13  | 0.5               | 1.0        | 1.5     | 1.5        | 4.70                   | 0.45                | 61.81         | 32.80   | 6145.85     | 169.30   | -142.80            | -83.47       |
| 14  | 1.5               | 1.0        | 1.5     | 1.5        | 4.87                   | 0.46                | 36.00         | 33.52   | 7038.75     | 165.69   | -116.16            | -113.54      |

|    |     |     |     |     |      |      |       |       |         |        |         |         |
|----|-----|-----|-----|-----|------|------|-------|-------|---------|--------|---------|---------|
| 15 | 0.5 | 3.0 | 1.5 | 1.5 | 4.90 | 0.46 | 53.00 | 22.89 | 6520.12 | 164.20 | -237.96 | -55.50  |
| 16 | 1.5 | 3.0 | 1.5 | 1.5 | 4.90 | 0.51 | 46.40 | 32.84 | 5720.18 | 163.98 | -94.51  | -66.00  |
| 17 | 0.5 | 2.0 | 1.0 | 1.0 | 4.90 | 0.49 | 63.00 | 24.89 | 6632.34 | 178.62 | -214.49 | -106.18 |
| 18 | 1.5 | 2.0 | 1.0 | 1.0 | 4.81 | 0.47 | 39.60 | 31.12 | 7897.93 | 168.92 | -155.51 | -99.59  |
| 19 | 1.0 | 1.0 | 1.0 | 1.0 | 5.09 | 0.48 | 45.00 | 23.33 | 5975.05 | 196.31 | -197.64 | -170.22 |
| 20 | 1.0 | 3.0 | 1.0 | 1.0 | 5.12 | 0.54 | 57.00 | 25.16 | 6084.44 | 166.05 | -187.10 | -84.19  |
| 21 | 1.0 | 2.0 | 0.5 | 1.0 | 5.10 | 0.49 | 52.00 | 24.44 | 6437.79 | 164.35 | -270.01 | -128.74 |
| 22 | 1.0 | 2.0 | 1.5 | 1.0 | 5.13 | 0.49 | 61.00 | 23.34 | 5681.39 | 272.24 | -197.21 | -80.26  |
| 23 | 1.0 | 2.0 | 1.0 | 0.5 | 5.12 | 0.54 | 61.00 | 24.89 | 6460.30 | 440.23 | -117.63 | -61.74  |
| 24 | 1.0 | 2.0 | 1.0 | 1.5 | 5.16 | 0.48 | 62.00 | 26.66 | 6613.80 | 163.91 | -178.08 | -93.16  |
| 25 | 1.0 | 2.0 | 1.0 | 1.0 | 5.11 | 0.5  | 55.00 | 28.90 | 6912.64 | 310.35 | -170.35 | -99.99  |
| 26 | 1.0 | 2.0 | 1.0 | 1.0 | 5.10 | 0.51 | 61.00 | 22.94 | 6502.54 | 278.35 | -172.46 | -89.99  |
| 27 | 1.0 | 2.0 | 1.0 | 1.0 | 5.11 | 0.51 | 63.00 | 22.09 | 6518.78 | 275.98 | -188.57 | -95.99  |
| 28 | 1.0 | 2.0 | 1.0 | 1.0 | 5.21 | 0.51 | 61.00 | 23.26 | 6521.45 | 252.46 | -206.33 | -105.99 |
| 29 | 1.0 | 2.0 | 1.0 | 1.0 | 5.09 | 0.52 | 62.00 | 22.16 | 6189.54 | 272.54 | -182.35 | -107.99 |

**Table 2S: ANOVA results for different parameters of the samples**

| Sl No | Model parameters              | DF | pH         |          | Titratable acidity |         | Syneresis  |          | WHC        |         | Consistency |         | Firmness   |          | Index of viscosity |         | Cohesiveness |         |
|-------|-------------------------------|----|------------|----------|--------------------|---------|------------|----------|------------|---------|-------------|---------|------------|----------|--------------------|---------|--------------|---------|
|       |                               |    | Sum of sq. | P-value  | Sum of sq.         | P-value | Sum of sq. | P-value  | Sum of sq. | P-value | Sum of sq.  | P-value | Sum of sq. | P-value  | Sum of sq.         | P-value | Sum of sq.   | P-value |
| 1     | Model                         | 14 | 0.4335     | < 0.0001 | 0.011634           | 0.0140  | 3570.81    | < 0.0001 | 512.5648   | 0.0117  | 11085285    | 0.0039  | 355082.9   | < 0.0001 | 47387.28           | 0.0108  | 14875.06     | 0.0040  |
| 2     | X <sub>1</sub>                | 1  | 0.0001     | 0.9009   | 0.0000347          | 0.7110  | 2571.521   | < 0.0001 | 133.0842   | 0.0029  | 1149545     | 0.4305  | 1069.799   | 0.4419   | 24715.97           | 0.0001  | 137.7319     | 0.4571  |
| 3     | X <sub>2</sub>                | 1  | 0.0145     | 0.0490   | 0.003472           | 0.0020  | 56.90667   | 0.1650   | 7.558272   | 0.4050  | 431541.30   | 0.1380  | 7629.054   | 0.0530   | 56.48898           | 0.8090  | 3879.474     | 0.0012  |
| 4     | X <sub>3</sub>                | 1  | 0.0010     | 0.5913   | 0.001256           | 0.0396  | 0.430901   | 0.9004   | 2.694294   | 0.6162  | 17637717    | 0.0067  | 52874.11   | < 0.0001 | 5450.891           | 0.0297  | 3545.763     | 0.0017  |
| 5     | X <sub>4</sub>                | 1  | 0.0057     | 0.1976   | 0.00045            | 0.1949  | 23.01811   | 0.3672   | 4.536072   | 0.5167  | 207883.54   | 0.2934  | 211457.9   | < 0.0001 | 951.7468           | 0.3292  | 1406.571     | 0.0284  |
| 6     | X <sub>1</sub> <sup>2</sup>   | 1  | 0.1704     | < 0.0001 | 0.001666           | 0.0202  | 101.3138   | 0.0709   | 46.53229   | 0.0513  | 21090087    | 0.0037  | 3980.946   | 0.1491   | 251.4718           | 0.6114  | 61.36235     | 0.6177  |
| 7     | X <sub>2</sub> <sup>2</sup>   | 1  | 0.0001     | 0.8499   | 0.000131           | 0.4746  | 111.2579   | 0.0597   | 0.611026   | 0.8107  | 285479.36   | 0.2216  | 2618.906   | 0.2360   | 16.02018           | 0.8975  | 978.3385     | 0.0609  |
| 8     | X <sub>3</sub> <sup>2</sup>   | 1  | 0.0003     | 0.9251   | 0.000429           | 0.2050  | 2.902582   | 0.7456   | 0.041123   | 0.9504  | 236500.27   | 0.2637  | 72.38459   | 0.8399   | 3883.157           | 0.0605  | 27.31439     | 0.7385  |
| 9     | X <sub>4</sub> <sup>2</sup>   | 1  | 0.0021     | 0.4278   | 0.000131           | 0.4746  | 40.15091   | 0.2387   | 10.46873   | 0.3294  | 79219.433   | 0.5113  | 20509.88   | 0.0038   | 5713.884           | 0.0266  | 2374.239     | 0.0067  |
| 10    | X <sub>1</sub> X <sub>2</sub> | 1  | 0.0016     | 0.484    | 0.00030            | 0.280   | 38.922     | 0.245    | 2.79558    | 0.609   | 2503980     | 0.002   | 173.855    | 0.754    | 2475.24            | 0.125   | 1.02414      | 0.948   |

|    |             |    |        |        |          |        |          |        |          |        |          |        |          |        |          |        |          |        |
|----|-------------|----|--------|--------|----------|--------|----------|--------|----------|--------|----------|--------|----------|--------|----------|--------|----------|--------|
|    |             |    |        | 9      | 6        | 3      |          | 7      | 4        | 7      |          | 0      | 5        | 4      | 5        | 3      | 2        | 4      |
| 11 | $X_1X_3$    | 1  | 0.0049 | 0.2299 | 0.000506 | 0.1707 | 151.6284 | 0.0314 | 0.762129 | 0.7891 | 853.792  | 0.9452 | 535.2869 | 0.5844 | 1450.399 | 0.2325 | 5.113564 | 0.8849 |
| 12 | $X_1X_4$    | 1  | 0.0009 | 0.5990 | 0.000506 | 0.1707 | 12.969   | 0.4958 | 1.236544 | 0.7335 | 974997.7 | 0.0330 | 920.7312 | 0.4749 | 18.18554 | 0.8909 | 204.3671 | 0.3673 |
| 13 | $X_2X_3$    | 1  | 0.0090 | 0.1105 | 0        | 1.0000 | 3.199627 | 0.7335 | 3.667225 | 0.5593 | 34513.05 | 0.6632 | 4708.729 | 0.1191 | 467.8919 | 0.4901 | 184.7364 | 0.3907 |
| 14 | $X_2X_4$    | 1  | 0.0012 | 0.5403 | 0.0004   | 0.2201 | 32.07806 | 0.2899 | 82.95566 | 0.0130 | 1849584  | 0.0057 | 6668.746 | 0.0682 | 448.2651 | 0.4992 | 1108.371 | 0.0477 |
| 15 | $X_3X_4$    | 1  | 0.0020 | 0.4331 | 0.0001   | 0.5314 | 5.622827 | 0.6522 | 1.071225 | 0.7513 | 157617.9 | 0.3579 | 45401.93 | 0.0001 | 1672.383 | 0.2016 | 2.61273  | 0.9176 |
| 16 | Residual    | 14 | 0.0435 |        | 0.003399 |        | 371.1735 |        | 143.5021 |        | 2441699  |        | 23911.27 |        | 13038.24 |        | 3296.717 |        |
| 17 | Lack of Fit | 10 | 0.0340 | 0.3906 | 0.003199 | 0.0443 | 331.9735 | 0.1255 | 110.8597 | 0.4119 | 2178424  | 0.1300 | 22178.59 | 0.0647 | 12196.64 | 0.0525 | 3080.721 | 0.0539 |
| 18 | Pure Error  | 4  | 0.0095 |        | 0.0002   |        | 39.2     |        | 32.64241 |        | 263274.3 |        | 1732.685 |        | 841.6053 |        | 215.9954 |        |
| 19 | $R^2$       |    | 0.9088 |        | 0.7739   |        | 0.9058   |        | 0.7813   |        | 0.8195   |        | 0.9369   |        | 0.7842   |        | 0.8186   |        |

**Table 3S: Color values the samples during storage**

| <b>Storage time</b> | <b>Control</b> |          |          | <b>Sample</b> |          |          |
|---------------------|----------------|----------|----------|---------------|----------|----------|
| <b>Days</b>         | <b>L</b>       | <b>a</b> | <b>b</b> | <b>L</b>      | <b>a</b> | <b>b</b> |
| <b>0</b>            | 74.16          | -2.42    | 20.16    | 74.46         | -2.21    | 21.23    |
| <b>3</b>            | 73.43          | -2.74    | 18.79    | 73.64         | -2.79    | 20.63    |
| <b>5</b>            | 75.26          | -2.96    | 21.98    | 73.98         | -2.69    | 21.36    |
| <b>7</b>            | 75.53          | -2.28    | 18.72    | 74.18         | -2.18    | 18.52    |
| <b>11</b>           | 77.73          | -2.74    | 24.81    | 76.14         | -3.74    | 22.31    |
| <b>15</b>           | 81.49          | -3.28    | 25.54    | 79.83         | -3.86    | 22.09    |

Color values of the samples were during analyzed during storage period to observe any change in the color of the product in terms of L, a, and b values. L-value indicates the lightness or whiteness of the samples, a-value indicates redness to greenness and b-value indicates blueness to yellowness.
